# Supplementary material for: The association between the flat feet and the symptoms of knee osteoarthritis
Source: Research Square preprint supplement (doi:10.21203/rs.3.rs-1240420/v1), 2022-02-02
Supplement: Supplementary file 1 [file d0d3072a34de53f9a4ffef98.docx]

Supplementary material

Measurement of femorotibial alignment with the method from Moyer et al.[16]


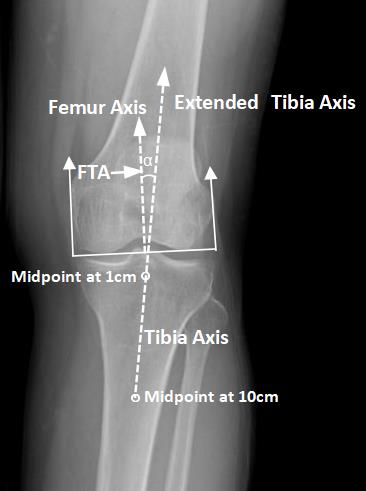


Fig. 1 Measurement of femorotibial alignment with the short knee radiograph. The femoral axis was perpendicular to the line tangent to the base of the femoral condyles; The tibial axis connected the centers of the shaft of tibia at two levels, which were 1 cm and 10 cm distal to the tibial plateau.
